# Supplementary material for: Centers for Mendelian Genomics: A decade of facilitating gene discovery
Source: bioRxiv or medRxiv preprint supplement (doi:10.1101/2021.08.24.21261656), 2021-08-31
Supplement: Supplementary file [file media-2.pdf]

**Supplemental table 2: CMG data sharing details**

| Center                   | ClinVar Name                                                                              | ClinVar URL                                                                                                                   | dbGaP/AnVIL Study accession ID |
|--------------------------|-------------------------------------------------------------------------------------------|-------------------------------------------------------------------------------------------------------------------------------|--------------------------------|
| Baylor-Hopkins           | Lupski Lab, Baylor-Hopkins CMG, BHCMG                                                     | <a href="https://www.ncbi.nlm.nih.gov/clinvar/submitters/505572/">https://www.ncbi.nlm.nih.gov/clinvar/submitters/505572/</a> | phs000711                      |
| Baylor-Hopkins           | Baylor-Hopkins Center for Mendelian Genomics (Johns Hopkins University)                   | <a href="https://www.ncbi.nlm.nih.gov/clinvar/submitters/505755/">https://www.ncbi.nlm.nih.gov/clinvar/submitters/505755/</a> | phs000711                      |
| Broad Institute          | Broad Institute Rare Disease Group (Broad Institute)                                      | <a href="https://www.ncbi.nlm.nih.gov/clinvar/submitters/506627/">https://www.ncbi.nlm.nih.gov/clinvar/submitters/506627/</a> | phs001272                      |
| University of Washington | University of Washington Center for Mendelian Genomics (University of Washington), UW-CMG | <a href="https://www.ncbi.nlm.nih.gov/clinvar/submitters/505516/">https://www.ncbi.nlm.nih.gov/clinvar/submitters/505516/</a> | phs000693                      |
| Yale                     | Yale Center for Mendelian Genomics (Yale University)                                      | <a href="https://www.ncbi.nlm.nih.gov/clinvar/submitters/506150/">https://www.ncbi.nlm.nih.gov/clinvar/submitters/506150/</a> | phs000744                      |
